# Supplementary material for: Ligand displacement for fixing manganese: relevance to cellular metal ion transport and synthesis of polymeric coordination complexes
Source: Royal Society of Chemistry journal article supplement (doi:10.1039/c2dt32547k), 2012-12-04
Supplement: c2dt32547k.pdf [file c2dt32547k.pdf]

## Electronic Supplementary Information

### **Ligand displacement for fixing manganese: relevance to cellular metal ion transport and synthesis of polymeric coordination complexes**

Noelia M. Sanchez-Ballester, Lok Kumar Shrestha, Mark R. J. Elsegood, Wolfgang Schmitt, Katsuhiko Ariga, Christopher E. Anson, Jonathan P. Hill and Annie K. Powell

#### **Contents**

|                                      |    |
|--------------------------------------|----|
| 1.0 Additional Structure Figure..... | S2 |
|--------------------------------------|----|

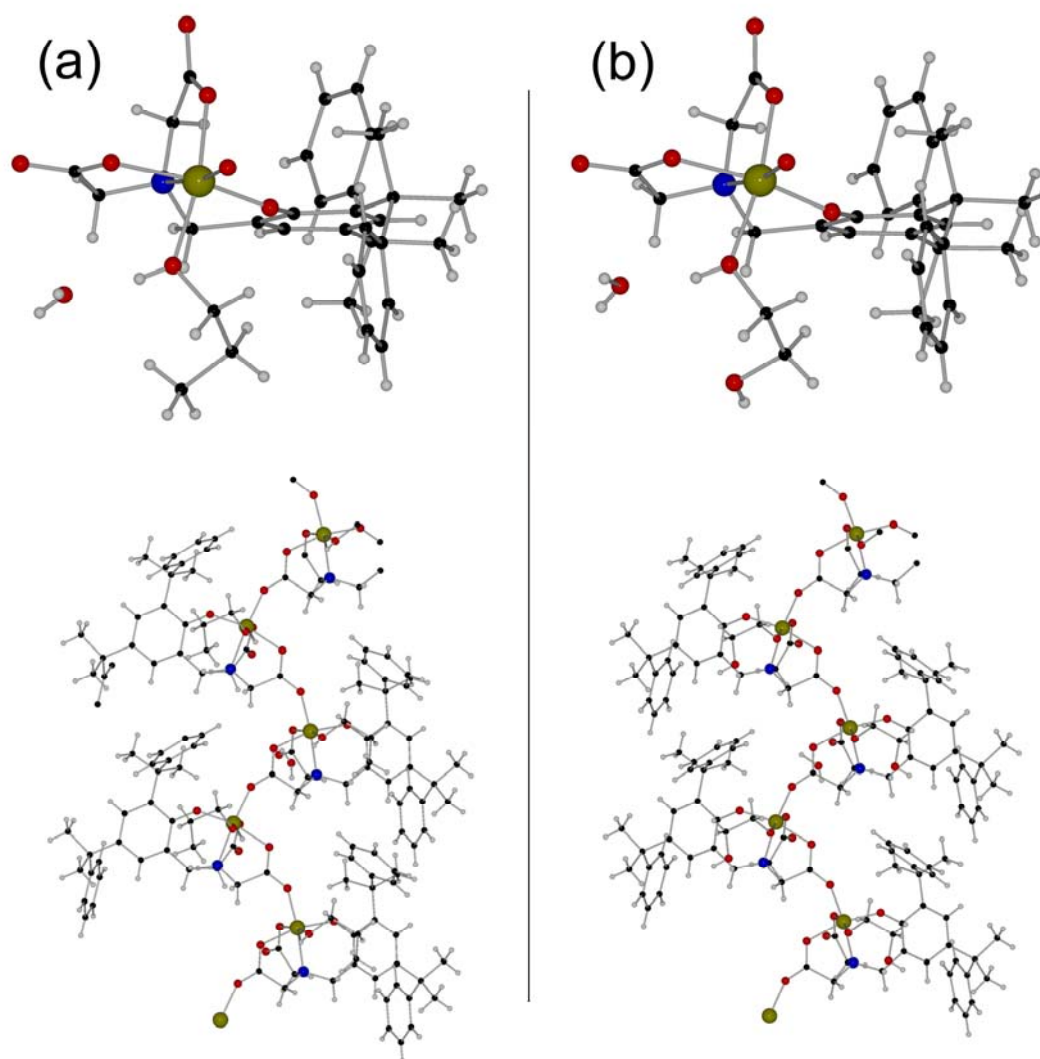

**Figure S1.** X-ray crystal structures of compounds **6** and **7**. (a) **6**. Top: mononuclear complex, bottom: linear polymer structure (viewed along *b*-axis) identical with **5** except that ethanol has been replaced by 1-propanol. (b) **7**. Top: mononuclear complex, bottom: linear polymer structure (viewed along *b*-axis) identical with **5** except that ethanol has been replaced by ethylene glycol.
